# Supplementary material for: RETRACTED ARTICLE: Improvement of a rapid diagnostic application of monoclonal antibodies against avian influenza H7 subtype virus using Europium nanoparticles
Source: PubMed Central journal article supplement (PMC5554140; doi:10.1038/s41598-017-08328-9), 2017-08-11
Supplement: 41598_2017_8328_MOESM1_ESM.pdf [file 41598_2017_8328_MOESM1_ESM.pdf]

## Supplementary information

**Title: Improvement of a rapid diagnostic application of monoclonal antibodies against avian influenza H7 subtype virus using Europium nanoparticles**

### Authors

Seon-Ju Yeo<sup>1‡</sup>, Duong Tuan Bao<sup>1‡</sup>, Ga-Eun Seo<sup>2</sup>, Bui Thi Cuc<sup>1</sup>, Do Thi Hoang Kim<sup>1</sup>, Nguyen Thi Viet Anh<sup>1</sup>, Trinh Thi Thuy Tien<sup>1</sup>, Nguyen Thi Phuong Linh<sup>1</sup>, Hae-Jin Sohn<sup>2</sup>, Chom-Kyu Chong<sup>3</sup>, Ho-Joon Shin<sup>2§</sup>, Hyun Park<sup>1§</sup>

### Figures

**Figure S1. Effect of Europium nanoparticle on FICT targeting influenza A NP**

**Figure S2. Performance of FICT to detect influenza A virus in clinical specimen.**

# A

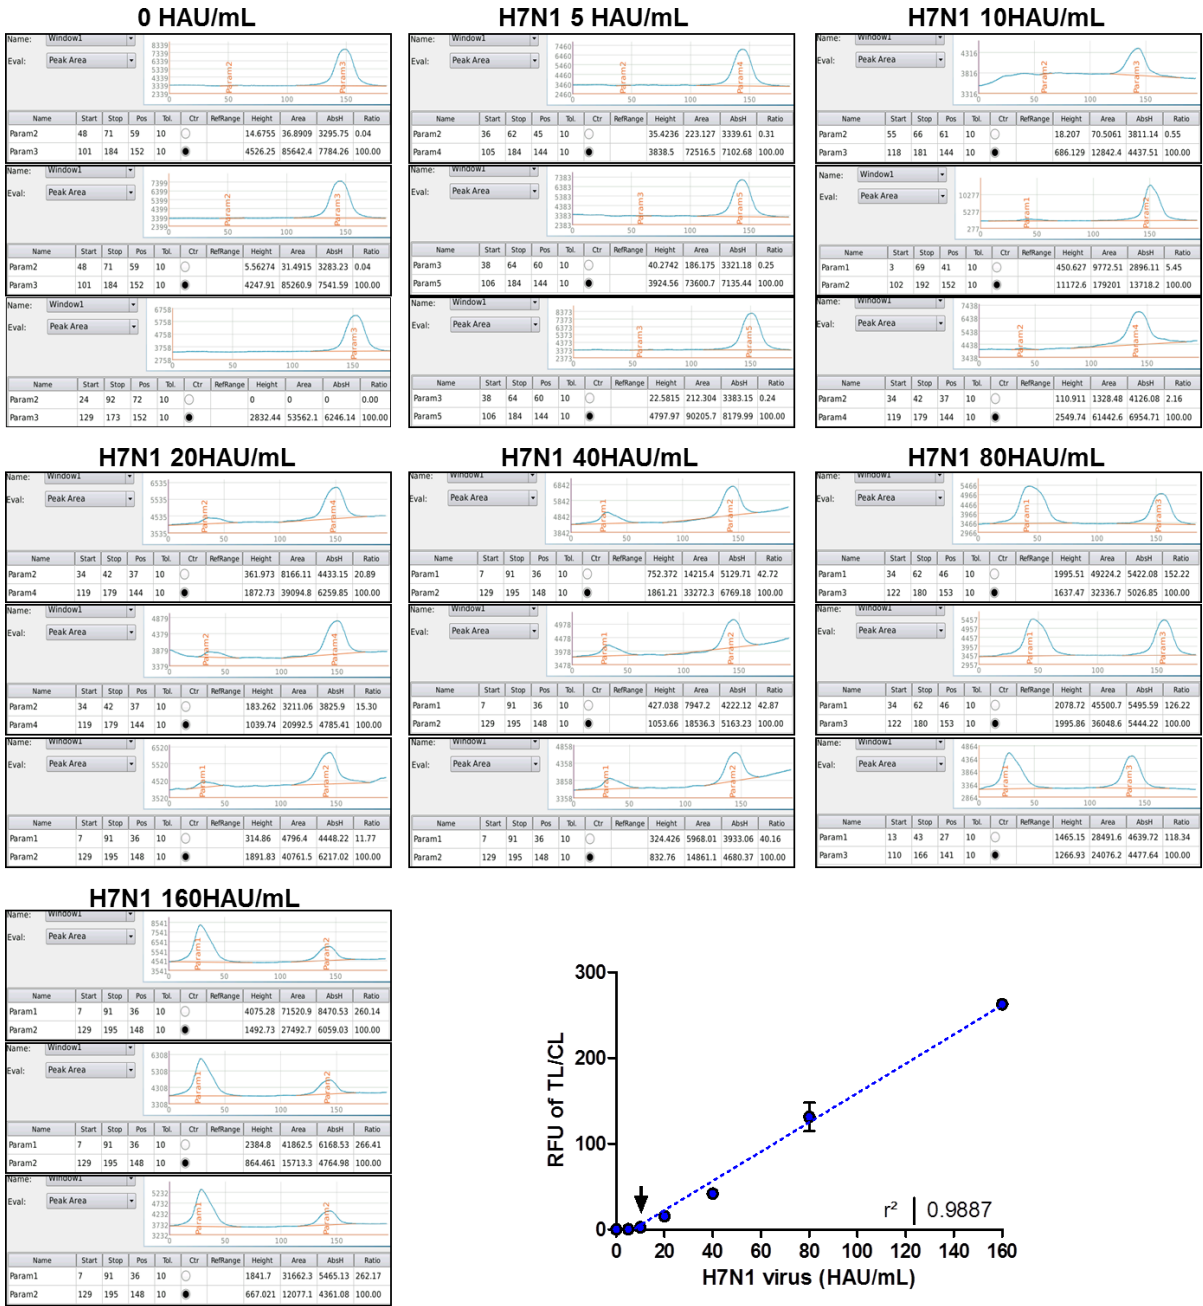

**B**

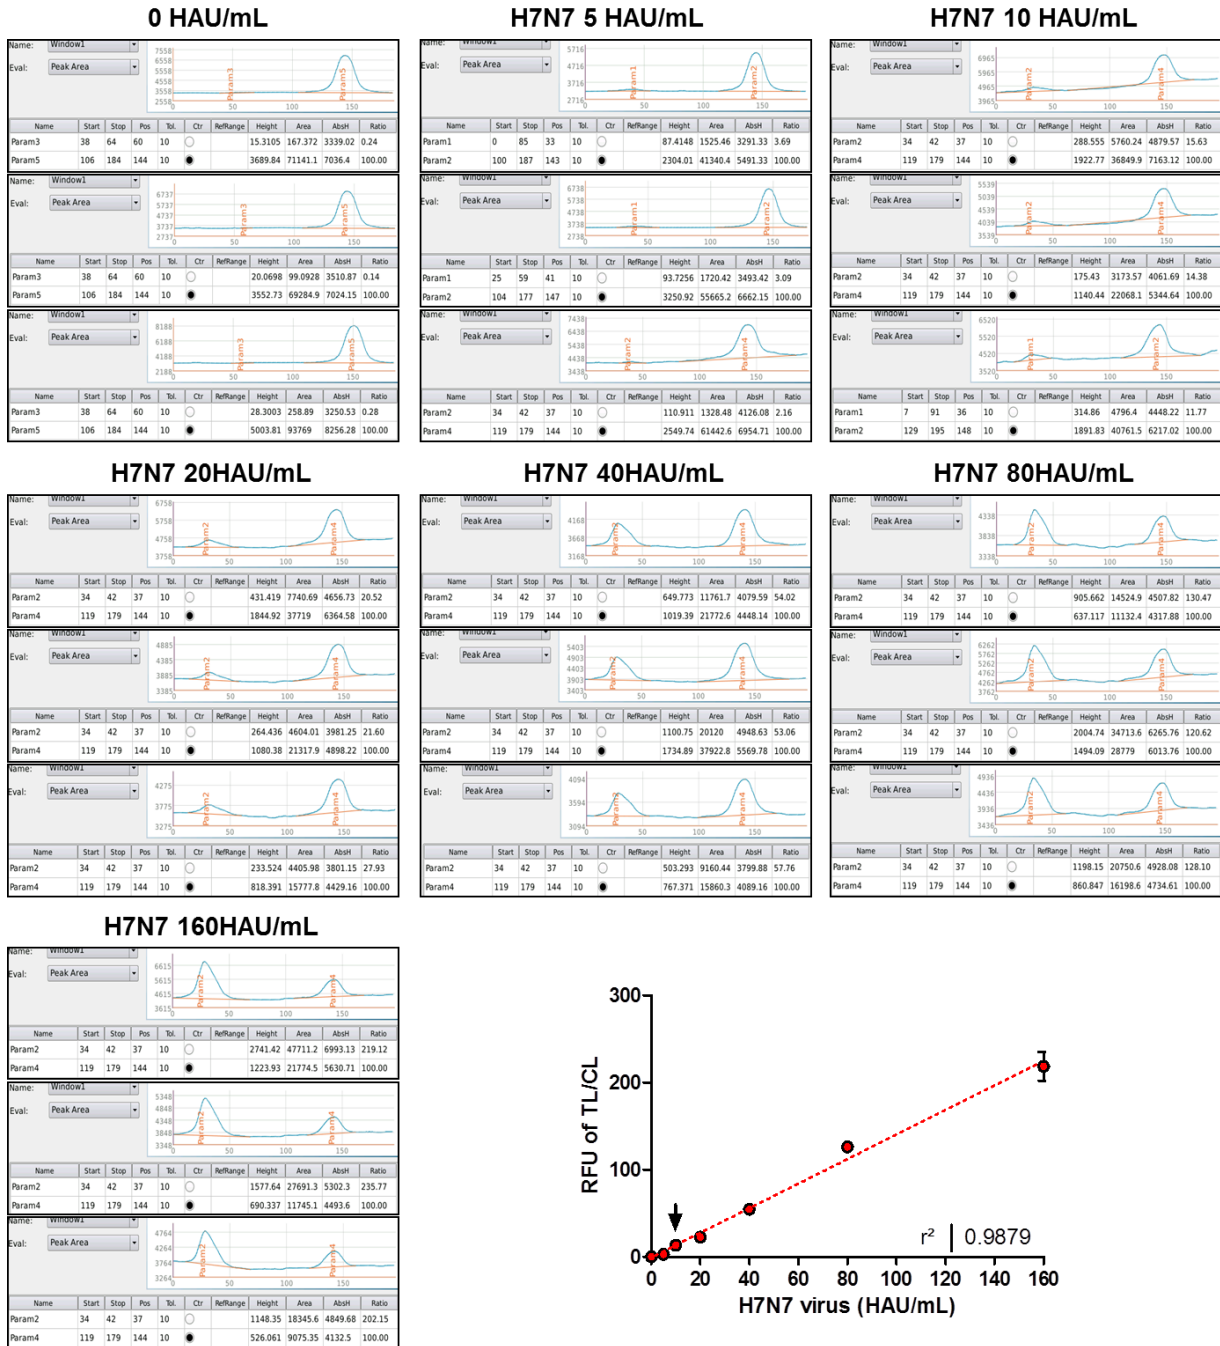

**Figure S1. Effect of Europium nanoparticle on FICT targeting influenza A NP.** Anti-influenza NP (3G6) was conjugated with Eu NP and tested in the strip which was coated with anti-influenza NP (Medix Biochemica Inc., Espoo, Finland). Serial dilutions of a virus stock in DW were tested in the FICT assay for H7N1 (A) and H7N7 (B). Arrow indicates the LOD.

# A

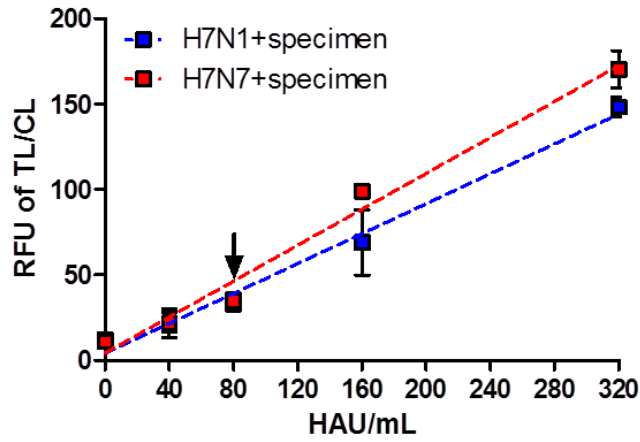

# B

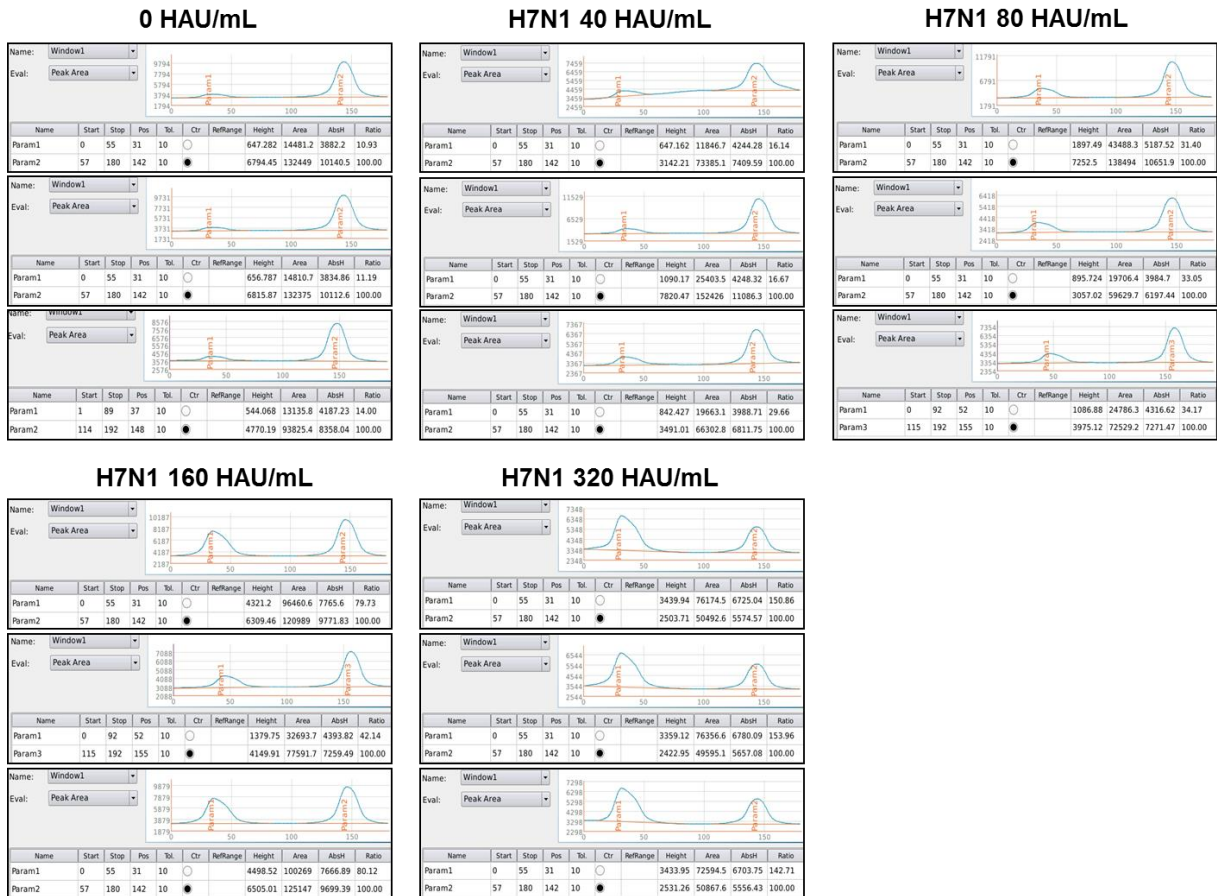

# C

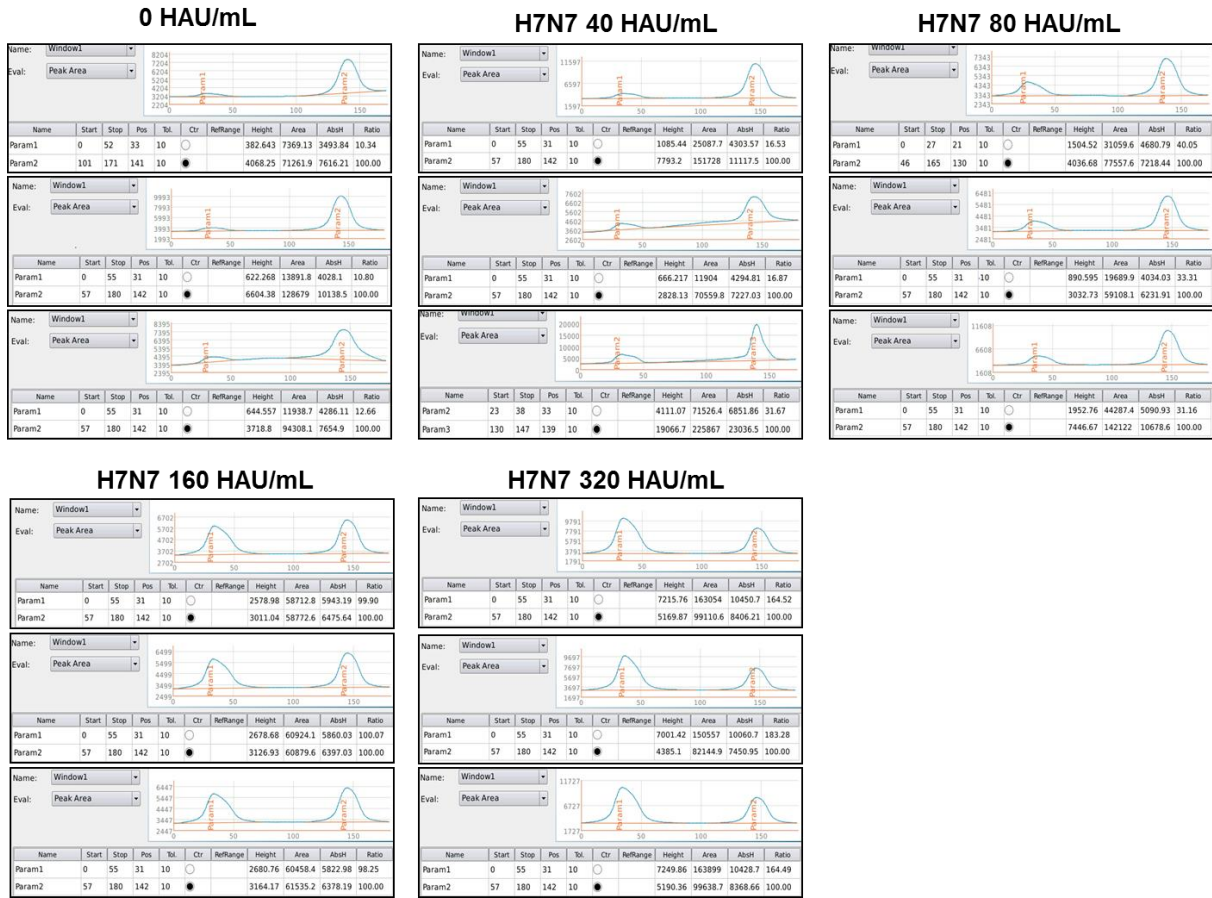

**Figure S2. Performance of FICT to detect H7 subtype virus in clinical specimen.** Virus was mixed in 1:100 ratio with human nasopharyngeal specimen instead of DW and tested in FICT (A). Raw FICT data showed the serial dilutions were tested in the FICT assay employing H7 subtype-specific antibodies (6D7/2F4) for H7N1 (B) and H7N7 (C). Arrow indicates the LOD.
